# Supplementary material
Source: HighWire-hosted journal article supplement (https://bmjopen.bmj.com/content/12/9/e061806)
Supplement: inline-supplementary-material-4 [file inline-supplementary-material-4.pdf]

**Supplement table 2.** Subgroups analyses.

|                                                                                                                                                                                                                                                                                                                                                                                         |
|-----------------------------------------------------------------------------------------------------------------------------------------------------------------------------------------------------------------------------------------------------------------------------------------------------------------------------------------------------------------------------------------|
| <b>Comparison of the effects between trials with different types of sedation interventions</b><br><br><i>Trials including volatile sedation</i><br><br><i>Trials including dexmedetomidine</i><br><br><i>Trials including propofol</i>                                                                                                                                                  |
| <b>Comparison of the effects between critically ill based on the cause of admission</b><br><br><i>Trials including patients with non-traumatic brain injury or</i><br><br><i>Trials including patients with traumatic brain injury or</i><br><br><i>Trials including patients with post cardiac arrest care or</i><br><br><i>Trials including patients with hemodynamic instability</i> |
| <b>Comparison of the effects between trials with different maximal follow-ups</b><br><br><i>Up to 90 days or</i><br><br><i>90 days and above</i>                                                                                                                                                                                                                                        |
| <b>Comparison of the effect between trials with different control interventions</b><br><br><i>Placebo-controlled trials</i><br><br><i>No control intervention</i>                                                                                                                                                                                                                       |
| <b>Comparison of the effects between industry funded trials or trials with unknown funding compared to non-industry funded trials</b><br><br><i>Industry funded trials or unknown funding</i><br><br><i>Non-industry funded trials</i>                                                                                                                                                  |
