# Supplementary material
Source: HighWire-hosted journal article supplement (https://bmjopen.bmj.com/content/12/9/e061806)
Supplement: inline-supplementary-material-5 [file inline-supplementary-material-5.pdf]

**Supplement table 3.** Describes sensitivity analyses of how the patients with lost to follow-up will be treated in the analyses of different scenarios for dichotomous and continuous outcomes, respectively.

| <b>Dichotomous outcomes</b>                       |                                                                                    |
|---------------------------------------------------|------------------------------------------------------------------------------------|
| <b>'Best-worst- case' scenario</b>                |                                                                                    |
| Experimental group                                | <i>Have survived, had no serious adverse event, and had no non-serious event</i>   |
| Control group                                     | <i>Have not survived, had a serious event, and had a non-serious adverse event</i> |
| <b>'Worst-best- case' scenario</b>                |                                                                                    |
| Experimental group                                | <i>Have not survived, had a serious event, and had a non-serious adverse event</i> |
| Control group                                     | <i>Have survived, had no serious adverse event, and had no non-serious event</i>   |
| <b>Continuous outcomes</b>                        |                                                                                    |
| <b>'Best-worst- case' scenario</b>                |                                                                                    |
| Experimental group will have a beneficial outcome | <i>The group mean plus one SD of the group mean</i>                                |
| Control group will have harmful outcome           | <i>The group mean minus one SD of the group mean</i>                               |
| <b>'Worst-best- case' scenario</b>                |                                                                                    |
| Experimental group will have a beneficial outcome | <i>The group mean plus one SD of the group mean</i>                                |
| Control group will have harmful outcome           | <i>The group mean minus one SD of the group mean</i>                               |
